# Supplementary material
Source: PubMed Central journal article supplement (PMC3675826)
Supplement: supp_O112.019828_mcp.O112.019828-5.pdf [file supp_O112.019828_mcp.O112.019828-5.pdf]

**Supplementary table S1: Summary features of the complex-complex predictions**

|                                                             | <b>Human</b> | <b>Yeast</b> |
|-------------------------------------------------------------|--------------|--------------|
| Distinct complexes                                          | 1216         | 471          |
| Protein network size (# of edges)                           | 63358        | 75090        |
| Proteins in the PPI networks (# nodes)                      | 11359        | 5959         |
| Proteins in curated complexes not in the PPIs               | 247          | 40           |
| Total proteins used in the analysis                         | 11606        | 5999         |
| Proteins not in curated complexes                           | 9468         | 4398         |
| Proteins in the PPIs mapped to a curated complex            | 2138         | 1601         |
| Number of complex-complex predictions at <10% FDR, ICE rule | 375          | 428          |
| Number of complex-complex predictions at <10% FDR, BSO rule | 1262         | 188          |

Descriptive statistics of the complex-complex interactions in human and yeast: The summary features of the source interactome data, protein complexes, and predictions from both organisms are depicted. For the physical complex-complex predictions, many complex pairs gave weaker predictions when the BSO rule was applied in yeast compared to the ICE rule. The reverse trend was observed in human. This particular effect in yeast was not a global phenomenon and largely occurred in complexes that contained many intra-complex interactions within either of the complex pair. When the ICE rule was applied in yeast, the intra-complex interactions were removed in these complex pairs, thus reducing the degrees of the proteins and that of the complexes. As a result, the complex-complex degrees were lowered for these complex pairs, and their expected number of random interactions was reduced accordingly. This led to more predictions for the ICE rule in yeast than in human. Due to the far greater tendency of complexes to share protein membership in human, the opposite phenomenon occurred: the ICE rule had the effect of being very strict across many complex pairs in the human interactome, and the BSO rule resulted in lower expected random values (due to lowered complex-complex degree among many complex pairs), leading to an increased number of predictions for BSO in human.
